## Research Article

# Investigation of *ICOS*, *CD28* and *CD80* polymorphisms with the risk of hepatocellular carcinoma: a case–control study in eastern Chinese population

Jing Yang<sup>1,\*</sup>, Jiaochun Liu<sup>2,\*</sup>, Yu Chen<sup>3,4,5,\*</sup>,  Weifeng Tang<sup>6</sup>, Kai Bo<sup>7</sup>, Yuling Sun<sup>7,8</sup> and Jianping Chen<sup>1</sup>

<sup>1</sup>Department of Gastroenterology, The Third Affiliated Hospital of Soochow University, Changzhou, Jiangsu Province, China; <sup>2</sup>Department of Gastroenterology, People's Liberation Army 92nd Hospital, Nanping, Fujian Province, China; <sup>3</sup>Cancer Bio-immunotherapy Center, Fujian Cancer Hospital and Fujian Medical University Cancer Hospital, Fuzhou, Fujian Province, China; <sup>4</sup>Department of Medical Oncology, Fujian Cancer Hospital and Fujian Medical University Cancer Hospital, Fuzhou, Fujian Province, China; <sup>5</sup>Fujian Provincial Key Laboratory of Translational Cancer Medicine, Fuzhou, Fujian Province, China; <sup>6</sup>Department of Cardiothoracic Surgery, Affiliated People's Hospital of Jiangsu University, Zhenjiang, Jiangsu Province, China; <sup>7</sup>Department of Hepatobiliary and Pancreatic Surgery, The First Affiliated Hospital of Zhengzhou University, Zhengzhou, Henan Province, China; <sup>8</sup>Institute of Hepatobiliary and Pancreatic Diseases, Zhengzhou University, Zhengzhou, Henan Province, China

**Correspondence:** Jianping Chen (cjp7668@163.com) or Yuling Su (ylsun@zzu.edu.cn)

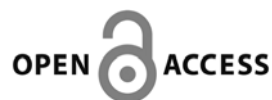

Single nucleotide polymorphisms (SNPs) in immune related gene may influence the susceptibility of cancer. We selected *inducible T cell costimulator (ICOS)* rs4404254 T>C, rs10932029 T>C, *CD28* rs3116496 T>C and *CD80* rs7628626 C>A SNPs and assessed the potential relationship of these SNPs with hepatocellular carcinoma (HCC) risk. A total of 584 HCC cases and 923 healthy controls were recruited. And SNPscan™ genotyping assay was used to obtain the genotypes of *ICOS*, *CD28* and *CD80* polymorphisms. We found that *ICOS* rs10932029 T>C polymorphism significantly increased the risk of HCC (additive model: adjusted odds ratio (OR), 1.59; 95% confidence interval (CI), 1.13–2.22; *P*=0.007; homozygote model: adjusted OR, 1.12; 95% CI, 0.31–4.03; *P*=0.867; dominant model: adjusted OR, 1.58; 95% CI, 1.14–2.19; *P*=0.007 and recessive model: adjusted OR, 1.02; 95% CI, 0.28–3.68; *P*=0.974). However, *ICOS* rs4404254 T>C, *CD28* rs3116496 T>C and *CD80* rs7628626 C>A SNPs were not associated with the risk of HCC. To evaluate the effects of *ICOS* rs10932029 T>C on HCC risk according to different age, gender, chronic hepatitis B virus (HBV) infection, tobacco consumption and drinking status, we carried out a stratification analysis. We found that *ICOS* rs10932029 T>C polymorphism might increase the risk of HCC in male, ≥53 years, never smoking, never drinking and non-chronic HBV infection subgroups. Our study highlights that *ICOS* rs10932029 T>C polymorphism may confer the susceptibility to HCC. It may be beneficial to explore the relationship between variants in immune related genes and the development of HCC.

\*These authors contributed equally to this work.

Received: 10 October 2018  
Revised: 06 June 2019  
Accepted: 19 June 2019

Accepted Manuscript Online:  
24 June 2019  
Version of Record published:  
05 July 2019

## Introduction

Hepatocellular carcinoma (HCC) remains a major public health problem worldwide, especially in China. [1] The etiology of HCC is very complicated. It is reported that many environmental factors and unhealthy lifestyles may influence the development and progress of HCC. The potential risk factors contributing to HCC are chronic hepatitis B virus (HBV) infection, aflatoxin, foods preserved by salting, smoking and drinking et al. [2–4] Although a growing number of investigations have focused on the etiology of HCC, it is not fully understood. It is suggested that an individual's hereditary factor is also implicated in pathogenesis of HCC. Recently, a number of studies reported that some immune related gene variants might play important roles in the development of HCC [5–7].

The process of T-cell activity is very complex. Several transmembrane receptor/ligand pairs cooperate with the T-cell receptor to inhibit or enhance the activity of T cells [8]. The CD28 immunoglobulin superfamily involves the co-inhibitory molecules CTLA-4 and PD-1 as well as the costimulatory molecules inducible T-cell costimulator (ICOS) and CD28. ICOS gene shares homology with human *CD28* gene [9]. Recently, it has been identified that ICOS may be up-regulated along with T-lymphocyte activation and then interacts with its ligand (ICOSL). Finally, these processes promote T-lymphocyte proliferation and T helper 2 (Th2) differentiation [10]. Nagase et al. [11] reported that ICOS+Foxp3+ tumor infiltrating lymphocytes were associated with prognosis of gastric cancer and effector regulatory T cell (Treg) correlated with *Helicobacter pylori*. In addition, a previous study suggested that Treg, especially ICOS+Foxp3+Treg, might be increased in the HCC microenvironment and predict reduced survival [12]. Based on the vital roles of participation in both T-lymphocyte proliferation and Th2 differentiation, any variant of *ICOS* gene may influence the development and carcinogenesis of HCC. The *ICOS* gene is polymorphic, which is located on chromosome 2 in humans. Several *ICOS* polymorphisms [e.g. rs10932029 T>C, rs4404254 T>C, rs4675379 G>C, rs10932037 C>T (ISV1+173T>C) and rs10183087 A>C] have been established. Among these single nucleotide polymorphisms (SNPs), *ICOS* rs10932029 T>C and rs4404254 T>C were most widely studied for their susceptibility to various cancers [13–16]. However, the observed results remain inconsistent rather than conclusive.

CD28 is expressed by most T cells, which competes with CTLA-4 for B7 binding and promotes T-cell proliferation. Recently, some epidemiological studies indicated the potential relationship between *CD28* rs3116496 T>C (IVS3 +17T>C) variants and cancer susceptibility. Several publications reported that *CD28* rs3116496 TT genotype conferred a low penetrance risk to breast cancer and cervical cancer [17,18]. However, the association between *CD28* rs3116496 T>C (IVS3 +17T>C) variants and HCC risk remains unknown.

CD80 (also B7-1) is a protein expressed on activated B cells, dendritic cells and monocytes, which provides a costimulatory signal for T-lymphocyte activation and survival. It is the ligand for CD28 (for auto-regulation and intercellular association). Wu et al. [13] reported that *CD80* rs7628626 C>A variants were not associated with the risk of CRC; however, *CD80* rs7628626 C>A variants were closely related to regional lymph node metastasis and aggressive tumor progression. Thus, *CD80* rs7628626 C>A may be implicated in the development of cancer.

Here, we selected *ICOS* rs4404254 T>C, rs10932029 T>C, *CD28* rs3116496 T>C and *CD80* rs7628626 C>A polymorphisms and carried out a hospital-based case-control study to explore the potential association of *ICOS*, *CD28* and *CD80* SNPs with the risk of HCC.

## Materials and methods

### Subjects

A total of 584 cases with HCC and non-cancer controls ( $n=923$ ) were recruited. HCC cases were enrolled in Fuzong Clinical Medical College and Union Clinical Medical College of Fujian Medical University, Fuzhou, China. Controls were included voluntarily, who participated in a routine medical check-up. All participants were eastern Chinese Han population and unrelated. HCC patients underwent operation, and the pathological findings were confirmed by two experienced pathologists. Controls were fully matched with HCC cases in terms of sex and age. Each participant signed a written informed consent. Risk factors (smoking and drinking) and demographic variables were collected by an interview. Hepatitis B surface antigen (HBsAg) was measured. The criteria of 'smoker' and 'drinker' were described in the previous study [19]. The corresponding data are presented in Table 1. The whole blood was donated by each participant and stored immediately at  $-80^{\circ}\text{C}$  until use. The study protocol was approved by Institutional Review Board at Fujian Medical University.

### Selection of SNPs

The polymorphisms of *ICOS*, *CD28* and *CD80* gene were selected based on publications, [13–18] in which polymorphisms were studied the association with the risk of cancer. Finally, *ICOS* rs4404254 T>C, rs10932029 T>C, *CD28* rs3116496 T>C and *CD80* rs7628626 C>A were selected and studied. The primary information of *ICOS* rs4404254 T>C, rs10932029 T>C, *CD28* rs3116496 T>C and *CD80* rs7628626 C>A SNPs is summarized in Table 2.

### DNA extraction and genotyping

Using the DNA Purification Kit (Promega, Madison, U.S.A.), we extracted the genomic DNA from lymphocytes. The obtained DNA was stored at  $-80^{\circ}\text{C}$  until use. The concentration and purity were measured by micro-spectrophotometer. SNPscan™ genotyping assay (Genesky Biotechnologies Inc., Shanghai, China), a double ligation and multiplex fluorescence PCR, [20] was used to analyze the variants of *ICOS* rs4404254 T>C, rs10932029 T>C, *CD28* rs3116496 T>C and *CD80* rs7628626 C>A polymorphisms. The success rates of *ICOS* rs4404254 T>C,

**Table 1** Distribution of selected demographic variables and risk factors in HCC cases and controls

| Variable              | HCC cases (n=584) |       | Healthy controls (n=923) |       | P <sup>1</sup>   |
|-----------------------|-------------------|-------|--------------------------|-------|------------------|
|                       | n                 | %     | n                        | %     |                  |
| Age (years)           | 53.17 (±11.76)    |       | 53.72 (±9.97)            |       | 0.327            |
| Age (years)           |                   |       |                          |       | 0.358            |
| <53                   | 264               | 45.21 | 395                      | 42.80 |                  |
| ≥53                   | 320               | 54.79 | 528                      | 57.20 |                  |
| Sex                   |                   |       |                          |       | 0.717            |
| Male                  | 525               | 89.90 | 835                      | 90.47 |                  |
| Female                | 59                | 10.10 | 88                       | 9.53  |                  |
| Smoking status        |                   |       |                          |       | 0.834            |
| Never                 | 374               | 64.04 | 596                      | 64.57 |                  |
| Ever                  | 210               | 35.96 | 327                      | 35.43 |                  |
| Alcohol use           |                   |       |                          |       | <b>&lt;0.001</b> |
| Never                 | 414               | 70.89 | 775                      | 83.97 |                  |
| Ever                  | 170               | 29.11 | 148                      | 16.03 |                  |
| Chronic HBV infection |                   |       |                          |       | <b>&lt;0.001</b> |
| Yes                   | 412               | 70.55 | 85                       | 9.21  |                  |
| No                    | 172               | 29.45 | 838                      | 90.79 |                  |

Bold values are statistically significant ( $P < 0.05$ ).

<sup>1</sup>Two-sided  $\chi^2$  test and Student's  $t$  test.

**Table 2** Primary information for *ICOS* rs4404254 T>C, rs10932029 T>C, *CD28* rs3116496 T>C and *CD80* rs7628626 C>A SNPs

| Genotyped SNPs             | Chromosome | Chr. Pos. (NCBI Build 38) | Region | MAF <sup>1</sup> for Chinese in database | MAF in our controls (n=923) | P-value for HWE <sup>2</sup> test in our controls | Genotyping method | Genotyping value (%) |
|----------------------------|------------|---------------------------|--------|------------------------------------------|-----------------------------|---------------------------------------------------|-------------------|----------------------|
| <i>ICOS</i> rs10932029 T>C | 2          | 203937045                 | Intron | 0.08                                     | 0.09                        | 0.962                                             | SNPscan           | 99.27                |
| <i>ICOS</i> rs4404254 T>C  | 2          | 203960563                 | 3'UTR  | 0.13                                     | 0.17                        | 0.442                                             | SNPscan           | 99.27                |
| <i>CD28</i> rs3116496 T>C  | 2          | 203729789                 | Intron | 0.10                                     | 0.10                        | 0.821                                             | SNPscan           | 99.27                |
| <i>CD80</i> rs7628626 C>A  | 3          | 119525574                 | 3'UTR  | 0.12                                     | 0.12                        | 0.948                                             | SNPscan           | 99.27                |

<sup>1</sup>MAF, minor allele frequency.

<sup>2</sup>HWE, Hardy–Weinberg equilibrium.

rs10932029 T>C, *CD28* rs3116496 T>C and *CD80* rs7628626 C>A genotyping are shown in Table 2. For quality control, four percent of overall DNA samples were randomly selected and analyzed. And the reproducibility was 100%.

## Statistical analysis

Age of participants was described as the mean  $\pm$  standard deviation (SD). And Student's  $t$  test was used to compare the difference among the HCC cases and non-cancer controls. An online software (<http://ihg.gsf.de/cgi-bin/hw/hwa1.pl>) was used to measure whether genotype distributions of *ICOS* rs4404254 T>C, rs10932029 T>C, *CD28* rs3116496 T>C and *CD80* rs7628626 C>A in controls deviate from Hardy–Weinberg equilibrium (HWE) [19,21–27]. Chi-square test ( $\chi^2$ ) or Fisher exact test was harnessed to compare the categorical variables (e.g. frequencies of *ICOS* rs4404254 T>C, rs10932029 T>C, *CD28* rs3116496 T>C and *CD80* rs7628626 C>A genotypes, age, sex, smoking status and drinking). Multivariate logistic regression was used to calculate the crude/adjusted odds ratios (ORs) and their 95% confidence intervals (CI) for the correlation of *ICOS* rs4404254 T>C, rs10932029 T>C, *CD28* rs3116496 T>C and *CD80* rs7628626 C>A polymorphisms with HCC susceptibility. We used SAS 9.4 software for Windows (SAS Institute Inc., Cary, NC, U.S.A.) to perform all statistical analysis. The statistical significance was

**Table 3** The frequencies of *ICOS* rs4404254 T>C, rs10932029 T>C, *CD28* rs3116496 T>C and *CD80* rs7628626 C>A polymorphisms in HCC patients and controls

| Genotype                   | Overall HCC case (n=584) |       | Overall controls (n=923) |       |
|----------------------------|--------------------------|-------|--------------------------|-------|
|                            | n                        | %     | n                        | %     |
| <i>ICOS</i> rs10932029 T>C |                          |       |                          |       |
| TT                         | 420                      | 73.04 | 756                      | 82.08 |
| TC                         | 146                      | 25.39 | 157                      | 17.05 |
| CC                         | 9                        | 1.57  | 8                        | 0.86  |
| CT+CC                      | 155                      | 26.96 | 165                      | 17.92 |
| TT+CT                      | 566                      | 98.43 | 913                      | 99.13 |
| C allele                   | 164                      | 14.26 | 173                      | 9.39  |
| <i>ICOS</i> rs4404254 T>C  |                          |       |                          |       |
| TT                         | 383                      | 66.61 | 642                      | 69.71 |
| TC                         | 172                      | 29.91 | 250                      | 27.14 |
| CC                         | 20                       | 3.48  | 29                       | 3.15  |
| CT+CC                      | 192                      | 33.39 | 279                      | 30.29 |
| TT+CT                      | 555                      | 96.52 | 892                      | 96.85 |
| C allele                   | 212                      | 18.43 | 308                      | 16.72 |
| <i>CD28</i> rs3116496 T>C  |                          |       |                          |       |
| TT                         | 466                      | 81.04 | 751                      | 81.54 |
| TC                         | 99                       | 17.22 | 162                      | 17.59 |
| CC                         | 10                       | 1.74  | 8                        | 0.87  |
| CT+CC                      | 109                      | 18.96 | 170                      | 18.46 |
| TT+CT                      | 565                      | 98.26 | 913                      | 99.13 |
| C allele                   | 119                      | 10.35 | 178                      | 9.66  |
| <i>CD80</i> rs7628626 C>A  |                          |       |                          |       |
| CC                         | 445                      | 77.39 | 721                      | 78.28 |
| CA                         | 120                      | 20.87 | 188                      | 20.41 |
| AA                         | 10                       | 1.74  | 12                       | 1.30  |
| CA+AA                      | 130                      | 22.61 | 200                      | 21.72 |
| CC+CA                      | 565                      | 98.26 | 909                      | 98.70 |
| A allele                   | 140                      | 12.17 | 212                      | 11.51 |

considered as  $P < 0.05$  (two-tailed). Power and Sample Size online software (<http://biostat.mc.vanderbilt.edu/twiki/bin/view/Main/PowerSampleSize>) was used to obtain the value of power ( $\alpha = 0.05$ ) [28].

## Results

### Baseline characteristics

The information of demographics (age and sex) and selected susceptibility factors (status of chronic HBV infection, smoking and drinking) are summarized in Table 1. As demonstrated in Table 1, this case-control study was matched by age, sex and smoking status ( $P=0.327$ ,  $P=0.717$  and  $P=0.834$  respectively). We found a significant difference in status of chronic HBV infection and drinking between the HCC patients and the controls ( $P < 0.001$ ). For *ICOS* rs4404254 T>C, rs10932029 T>C, *CD28* rs3116496 T>C and *CD80* rs7628626 C>A polymorphisms, the success rate of genotyping was more than 99.00% (Table 2). In our study, the minor allele frequencies (MAFs) of *ICOS* rs4404254 T>C, rs10932029 T>C, *CD28* rs3116496 T>C and *CD80* rs7628626 C>A were similar to the data for Chinese Han population. The distributions of *ICOS* rs4404254 T>C, rs10932029 T>C, *CD28* rs3116496 T>C and *CD80* rs7628626 C>A genotype frequencies were accorded with HWE (Table 2).

### Association of *ICOS* rs4404254 T>C, rs10932029 T>C, *CD28* rs3116496 T>C and *CD80* rs7628626 C>A polymorphisms with HCC

The genotype distributions of *ICOS* rs4404254 T>C, rs10932029 T>C, *CD28* rs3116496 T>C and *CD80* rs7628626 C>A variants are summarized in Table 3.

The frequencies of *ICOS* rs10932029 TT, TC and CC genotypes were 73.04, 25.39 and 1.57% in 584 HCC patients and 82.08, 17.05, and 0.86% in 923 controls, respectively. When compared with the frequency of *ICOS* rs10932029 TT

**Table 4 Overall analysis of *ICOS* rs4404254 T>C, rs10932029 T>C, *CD28* rs3116496 T>C and *CD80* rs7628626 C>A polymorphisms with HCC**

| Genotype                   | Overall (584 cases vs. 923 controls) |                  | Adjusted OR <sup>1</sup> (95% CI) | P            |
|----------------------------|--------------------------------------|------------------|-----------------------------------|--------------|
|                            | Crude OR (95% CI)                    | P                |                                   |              |
| <i>ICOS</i> rs10932029 T>C |                                      |                  |                                   |              |
| Additive model             | <b>1.64 (1.27–2.12)</b>              | <b>&lt;0.001</b> | <b>1.59 (1.13–2.22)</b>           | <b>0.007</b> |
| Homozygote model           | 1.99 (0.76–5.19)                     | 0.161            | 1.12 (0.31–4.03)                  | 0.867        |
| Dominant model             | <b>1.69 (1.32–2.17)</b>              | <b>&lt;0.001</b> | <b>1.58 (1.14–2.19)</b>           | <b>0.007</b> |
| Recessive model            | 1.82 (0.76–4.73)                     | 0.223            | 1.02 (0.28–3.68)                  | 0.974        |
| <i>ICOS</i> rs4404254 T>C  |                                      |                  |                                   |              |
| Additive model             | 1.13 (0.90–1.42)                     | 0.299            | 0.94 (0.69–1.28)                  | 0.698        |
| Homozygote model           | 1.13 (0.63–2.03)                     | 0.675            | 1.21 (0.56–2.61)                  | 0.636        |
| Dominant model             | 1.15 (0.92–1.44)                     | 0.210            | 0.98 (0.73–1.31)                  | 0.884        |
| Recessive model            | 1.11 (0.62–1.98)                     | 0.728            | 1.24 (0.58–2.66)                  | 0.587        |
| <i>CD28</i> rs3116496 T>C  |                                      |                  |                                   |              |
| Additive model             | 0.97 (0.74–1.28)                     | 0.821            | 0.87 (0.60–1.25)                  | 0.437        |
| Homozygote model           | 1.98 (0.78–5.06)                     | 0.153            | 1.54 (0.44–5.44)                  | 0.503        |
| Dominant model             | 1.03 (0.79–1.35)                     | 0.809            | 0.91 (0.64–1.29)                  | 0.594        |
| Recessive model            | 2.02 (0.79–5.15)                     | 0.141            | 1.59 (0.45–5.61)                  | 0.468        |
| <i>CD80</i> rs7628626 C>A  |                                      |                  |                                   |              |
| Additive model             | 1.02 (0.79–1.32)                     | 0.901            | 1.00 (0.71–1.40)                  | 0.998        |
| Homozygote model           | 1.33 (0.57–3.10)                     | 0.513            | 1.72 (0.57–5.19)                  | 0.332        |
| Dominant model             | 1.05 (0.82–1.35)                     | 0.684            | 1.05 (0.76–1.46)                  | 0.777        |
| Recessive model            | 1.34 (0.58–3.12)                     | 0.497            | 1.73 (0.58–5.20)                  | 0.326        |

<sup>1</sup>Adjusted for age, sex, chronic HBV infection, smoking and alcohol use in a logistic regression model.

genotype, there was a significant difference in the frequency of *ICOS* rs10932029 TC genotype between the HCC patients and control subjects (crude OR = 1.64, 95% CI: 1.27–2.12,  $P < 0.001$ ). When the frequency of *ICOS* rs10932029 TT genotype was used as a reference, we found no difference in the frequency of *ICOS* rs10932029 CC genotype between the HCC patients and control subjects (crude OR = 1.99, 95% CI: 0.76–5.19,  $P = 0.161$ ). When compared with the frequency of *ICOS* rs10932029 TT genotype, there was a difference in the frequency of *ICOS* rs10932029 TC/CC genotype between HCC patients and the controls (crude OR = 1.69, 95% CI: 1.32–2.17,  $P < 0.001$ ). When the frequency of *ICOS* rs10932029 TT/TC genotype was used as reference, there was no difference in the frequency of *ICOS* rs10932029 CC genotype between HCC patients and the controls (crude OR = 1.82, 95% CI: 0.76–4.73,  $P = 0.223$ ). Adjustment for age, sex, chronic HBV infection, smoking and drinking, these potential associations were not altered (additive model: adjusted OR, 1.59; 95% CI, 1.13–2.22;  $P = 0.007$ ; homozygote model: adjusted OR, 1.12; 95% CI, 0.31–4.03;  $P = 0.867$ ; dominant model: adjusted OR, 1.58; 95% CI, 1.14–2.19;  $P = 0.007$  and recessive model: adjusted OR, 1.02; 95% CI, 0.28–3.68;  $P = 0.974$ ; Table 4).

However, in our study, no significant association of *ICOS* rs4404254 T>C, *CD28* rs3116496 T>C and *CD80* rs7628626 C>A variants with the risk of HCC was found.

We used a software to calculate the power value ( $\alpha = 0.05$ ). For *ICOS* rs10932029 T>C, the power value was 0.940 in additive model and 0.942 in dominant model.

## Association of *ICOS* rs10932029 T>C polymorphism with HCC in different stratification groups

To evaluate the effects of *ICOS* rs10932029 T>C on HCC risk according to different age, gender, chronic HBV infection, smoking and drinking status, we carried out a subgroup analysis. Table 5 lists frequencies of *ICOS* rs10932029 T>C variants in the stratified analysis. After adjustment by logistic regression analysis with these risk factors, we found that *ICOS* rs10932029 T>C polymorphism might be associated with an increased risk of HCC in some subgroups [male group: TC vs. TT: adjusted OR = 1.47, 95% CI 1.01–2.12,  $P = 0.043$  and TC/CC vs. TT: adjusted OR = 1.49, 95% CI 1.04–2.13,  $P = 0.031$ ;  $\geq 53$  years subgroup: TC vs. TT: adjusted OR = 1.70, 95% CI 1.09–2.64,  $P = 0.020$  and TC/CC vs. TT: adjusted OR = 1.62, 95% CI 1.05–2.49,  $P = 0.029$ ; never smoking group: TC/CC vs. TT: adjusted OR = 1.49, 95% CI 1.00–2.22,  $P = 0.049$  and never drinking group: TC vs. TT: adjusted OR = 1.56, 95% CI 1.07–2.26,  $P = 0.020$  and TC/CC vs. TT: adjusted OR = 1.57, 95% CI 1.09–2.26,  $P = 0.016$  and non-chronic HBV infection group:



**Table 5 Stratified analyses between ICOS rs10932029 T>C polymorphism and HCC risk**

| Variable              | ICOS (case/control) <sup>1</sup> |         | rs10932029 T>C |      | Adjusted OR <sup>2</sup> (95% CI); P |                             |                                   |                             |
|-----------------------|----------------------------------|---------|----------------|------|--------------------------------------|-----------------------------|-----------------------------------|-----------------------------|
|                       | TT                               | TC      | CC             | TT   | TC                                   | CC                          | TC/CC                             | CC vs. (TC/TT)              |
| Sex                   |                                  |         |                |      |                                      |                             |                                   |                             |
| Male                  | 379/683                          | 129/143 | 9/7            | 1.00 | <b>1.47 (1.01–2.12); P: 0.043</b>    | 1.56 (0.40–6.18); P: 0.525  | <b>1.49 (1.04–2.13); P: 0.031</b> | 1.45 (0.37–5.73); P: 0.595  |
| Female                | 41/73                            | 17/14   | 0/1            | 1.00 | 2.39 (0.94–6.05); P: 0.067           | -                           | 2.14 (0.86–5.29); P: 0.101        | -                           |
| Age (years)           |                                  |         |                |      |                                      |                             |                                   |                             |
| <53                   | 197/319                          | 61/72   | 2/2            | 1.00 | 1.41 (0.85–2.35); P: 0.182           | 3.36 (0.34–33.23); P: 0.301 | 1.48 (0.89–2.44); P: 0.128        | 3.15 (0.32–31.09); P: 0.325 |
| ≥53                   | 223/437                          | 85/85   | 7/6            | 1.00 | <b>1.70 (1.09–2.64); P: 0.020</b>    | 0.76 (0.18–3.18); P: 0.709  | <b>1.62 (1.05–2.49); P: 0.029</b> | 0.69 (0.17–2.85); P: 0.603  |
| Smoking status        |                                  |         |                |      |                                      |                             |                                   |                             |
| Never                 | 271/487                          | 93/102  | 4/5            | 1.00 | 1.50 (1.00–2.24); P: 0.050           | 0.97 (0.17–5.49); P: 0.973  | <b>1.49 (1.00–2.22); P: 0.049</b> | 0.90 (0.16–5.08); P: 0.907  |
| Ever                  | 149/269                          | 53/55   | 5/3            | 1.00 | 1.77 (0.95–3.31); P: 0.072           | 1.33 (0.19–9.37); P: 0.774  | 1.75 (0.95–3.20); P: 0.071        | 1.18 (0.17–8.21); P: 0.866  |
| Alcohol consumption   |                                  |         |                |      |                                      |                             |                                   |                             |
| Never                 | 299/635                          | 103/132 | 6/6            | 1.00 | <b>1.56 (1.07–2.26); P: 0.020</b>    | 1.41 (0.34–5.89); P: 0.640  | <b>1.57 (1.09–2.26); P: 0.016</b> | 1.30 (0.31–5.41); P: 0.721  |
| Ever                  | 121/121                          | 43/25   | 3/2            | 1.00 | 1.61 (0.76–3.43); P: 0.218           | 0.33 (0.01–8.03); P: 0.497  | 1.50 (0.71–3.16); P: 0.285        | 0.30 (0.01–7.01); P: 0.451  |
| Chronic HBV infection |                                  |         |                |      |                                      |                             |                                   |                             |
| Yes                   | 296/65                           | 100/19  | 8/1            | 1.00 | 1.08 (0.60–1.95); P: 0.794           | 1.66 (0.19–14.92); P: 0.650 | 1.14 (0.64–2.03); P: 0.657        | 1.67 (0.19–14.96); P: 0.645 |
| No                    | 124/691                          | 46/138  | 1/7            | 1.00 | <b>1.85 (1.25–2.73); P: 0.002</b>    | 0.80 (0.10–6.60); P: 0.832  | <b>1.81 (1.23–2.66); P: 0.003</b> | 0.70 (0.08–5.79); P: 0.740  |

<sup>1</sup>The genotyping was successful in 575 (98.46%) HCC cases and 921 (99.78%) controls for ICOS rs10932029 T>C.

<sup>2</sup>Adjusted for age, sex, chronic HBV infection, smoking and alcohol consumption (besides stratified factors accordingly) in a logistic regression model.

TC vs. TT: adjusted OR = 1.85, 95% CI 1.25–2.73, P=0.002 and TC/CC vs. TT: adjusted OR = 1.81, 95% CI 1.23–2.66, P=0.003 (Table 5)].

## Discussion

HBV is considered as an important risk factor in the development of HCC. However, the incidence of HCC alters materially between similarly chronic HBV infection subjects, suggesting that hereditary factor may contribute to its development. Of late, a number of studies reported that immune related gene variants might be associated with the development of HCC [29–33]. In consideration of the role of ICOS, CD28 and CD80 genes in tumor immunity, we chose ICOS rs4404254 T>C, rs10932029 T>C, CD28 rs3116496 T>C and CD80 rs7628626 C>A SNPs to explore their potential roles in the etiology of HCC. In this case–control study, we found that ICOS rs10932029 T>C polymorphism was associated with the risk of HCC. In the stratified analysis, we found that ICOS rs10932029 T>C polymorphism might be associated with the risk of HCC in male, ≥53 years, never smoking, never drinking and non-chronic HBV infection subgroups.

Rs10932029 T>C polymorphism is located on first intron region of ICOS gene, [16] where a number of splicing and regulatory components may interact with it [34]. Recently, several case–control studies have assessed the relationship of ICOS rs10932029 T>C polymorphism with cancer risk [15,16,35,36]; however, the results are controversial. Several epidemiological studies reported that ICOS rs10932029 T>C polymorphism was not associated with the risk of cancer [16,35,36]. However, Xu et al. [15] found that compared with ICOS rs10932029 TT genotype and T allele, the ICOS rs10932029 CT genotype and C allele conferred a significantly increased susceptibility to breast cancer, and this correlation was also identified in a validation cohort. In addition, a previous study indicated that compared with

ICOS rs10932029 TT genotype, ICOS rs10932029 CT genotype was associated with a higher rate of disease progression in B-cell chronic lymphocytic leukemia patients [35]. In this case-control study, we found ICOS rs10932029 T>C locus might be associated with an increased risk of HCC, which was similar to the results of the previous study [15]. In the future, the potential role of ICOS rs10932029 T>C on influencing the expression of ICOS in HCC patient blood cells should be assessed to support our findings.

There are some limitations that should be acknowledged. First, all participants were recruited in two local hospitals in Fuzhou City, China. These subjects might not fully represent the eastern Chinese Han population. Second, only four important SNPs in ICOS, CD28 and CD80 genes were selected, which lack sufficient power to assess the total inherited risk in these genes. In the future, a tagging or a fine-mapping study is needed to further explore the potential association between SNPs in ICOS, CD28 and CD80 gene and the development of HCC. Third, in the present study, there is lack of the data about the expression or function of ICOS associated with rs10932029 T>C polymorphism. Finally, for lack of information for co-variables (e.g. body mass index, diet, lifestyle and so on), a more precise assessment was not carried out.

In summary, our study highlights that ICOS rs10932029 T>C polymorphism was associated with the susceptibility of HCC, especially in male,  $\geq 53$  years, never smoking, never drinking and non-chronic HBV infection subgroups. Our primary study shows that immune related gene variants may be advantageous for exploring susceptible to HCC.

## Acknowledgments

We appreciate all subjects who participated in the present study. We wish to thank Dr. Yan Liu (Genesky Biotechnologies Inc., Shanghai, China) for technical support.

## Author Contribution

Conceived and designed the experiments: Y.S. and J.C. Performed the experiments: J.Y., J.L. and Y.C. Analyzed the data: W.T., K.B., J.Y., J.L. and Y.C. Contributed reagents/materials/analysis tools: Y.S. and J.C. Wrote the manuscript: J.Y., J.L. and Y.C.

## Competing Interests

The authors declare that there are no competing interests associated with the manuscript.

## Funding

This work was supported in part by the Young Talent Training Project of Health Development Planning Commission of Changzhou City [grant number QN201706].

## Abbreviations

CI, confidence interval; CTLA-4, cytotoxic T-lymphocyte antigen 4; Foxp3, forkhead box p3; HBV, hepatitis B virus; HCC, hepatocellular carcinoma; HWE, Hardy-Weinberg equilibrium; ICOS, inducible T cell costimulator; OR, odds ratio; PD-1, programmed death-1; SNP, single nucleotide polymorphism; Th2, T helper 2; Treg, regulatory T cell.

## References

- 1 Chen, W., Zheng, R., Baade, P.D. et al. (2016) Cancer statistics in China, 2015. *CA Cancer J. Clin.* **66**, 115–132, <https://doi.org/10.3322/caac.21338>
- 2 Phukan, R.K., Borkakoty, B.J., Phukan, S.K. et al. (2018) Association of processed food, synergistic effect of alcohol and HBV with hepatocellular carcinoma in a high incidence region of India. *Cancer Epidemiology* **53**, 35–41, <https://doi.org/10.1016/j.canep.2018.01.005>
- 3 El-Serag, H.B. (2011) Hepatocellular carcinoma. *N. Engl. J. Med.* **365**, 1118–1127, <https://doi.org/10.1056/NEJMra1001683>
- 4 Mittal, S. and El-Serag, H.B. (2013) Epidemiology of hepatocellular carcinoma: consider the population. *J. Clin. Gastroenterol.* **47**, S2–S6, <https://doi.org/10.1097/MCG.0b013e3182872f29>
- 5 Li, Z., Li, N., Li, F. et al. (2016) Immune checkpoint proteins PD-1 and TIM-3 are both highly expressed in liver tissues and correlate with their gene polymorphisms in patients with HBV-related hepatocellular carcinoma. *Medicine* **95**, e5749, <https://doi.org/10.1097/MD.00000000000005749>
- 6 Wang, B., Yeh, C.B., Lein, M.Y. et al. (2016) Effects of HMGB1 polymorphisms on the susceptibility and progression of hepatocellular carcinoma. *Int. J. Med. Sci.* **13**, 304–309, <https://doi.org/10.7150/ijms.14877>
- 7 Junjie, X., Songyao, J., Minmin, S. et al. (2012) The association between Toll-like receptor 2 single-nucleotide polymorphisms and hepatocellular carcinoma susceptibility. *BMC Cancer* **12**, 57, <https://doi.org/10.1186/1471-2407-12-57>
- 8 Sharpe, A.H. (2009) Mechanisms of costimulation. *Immunol. Rev.* **229**, 5–11, <https://doi.org/10.1111/j.1600-065X.2009.00784.x>
- 9 Huttloff, A., Dittrich, A.M., Beier, K.C. et al. (1999) ICOS is an inducible T-cell co-stimulator structurally and functionally related to CD28. *Nature* **397**, 263–266, <https://doi.org/10.1038/16717>
- 10 Simpson, T.R., Quezada, S.A. and Allison, J.P. (2010) Regulation of CD4 T cell activation and effector function by inducible costimulator (ICOS). *Curr. Opin. Immunol.* **22**, 326–332, <https://doi.org/10.1016/j.coi.2010.01.001>

- 11 Nagase, H., Takeoka, T., Urakawa, S. et al. (2017) ICOS(+) Foxp3(+) TILs in gastric cancer are prognostic markers and effector regulatory T cells associated with *Helicobacter pylori*. *Int. J. Cancer* **140**, 686–695, <https://doi.org/10.1002/ijc.30475>
- 12 Tu, J.F., Ding, Y.H., Ying, X.H. et al. (2016) Regulatory T cells, especially ICOS(+) FOXP3(+) regulatory T cells, are increased in the hepatocellular carcinoma microenvironment and predict reduced survival. *Sci. Rep.* **6**, 35056, <https://doi.org/10.1038/srep35056>
- 13 Wu, D., Tang, R., Qi, Q. et al. (2015) Five functional polymorphisms of B7/CD28 co-signaling molecules alter susceptibility to colorectal cancer. *Cell. Immunol.* **293**, 41–48, <https://doi.org/10.1016/j.cellimm.2014.11.006>
- 14 Ivansson, E.L., Juko-Pecirep, I. and Gyllensten, U.B. (2010) Interaction of immunological genes on chromosome 2q33 and IFNG in susceptibility to cervical cancer. *Gynecol. Oncol.* **116**, 544–548, <https://doi.org/10.1016/j.ygyno.2009.10.084>
- 15 Xu, F., Li, D., Zhang, Q. et al. (2011) ICOS gene polymorphisms are associated with sporadic breast cancer: a case-control study. *BMC Cancer* **11**, 392, <https://doi.org/10.1186/1471-2407-11-392>
- 16 Hu, J., Li, Q.L., Hou, S.H., Peng, H. and Guo, J.J. (2015) Association of inducible T cell costimulator polymorphisms with susceptibility and outcome of hepatitis B virus infection in a Chinese Han population. *Scand. J. Immunol.* **82**, 275–281, <https://doi.org/10.1111/sji.12319>
- 17 Chen, X., Li, H., Qiao, Y. et al. (2011) Association of CD28 gene polymorphism with cervical cancer risk in a Chinese population. *Int. J. Immunogenet.* **38**, 51–54, <https://doi.org/10.1111/j.1744-313X.2010.00969.x>
- 18 Chen, S., Zhang, Q., Shen, L. et al. (2012) Investigation of CD28 gene polymorphisms in patients with sporadic breast cancer in a Chinese Han population in Northeast China. *PLoS ONE* **7**, e48031, <https://doi.org/10.1371/journal.pone.0048031>
- 19 Tang, W., Zhang, S., Qiu, H. et al. (2014) Genetic variations in MTHFR and esophageal squamous cell carcinoma susceptibility in Chinese Han population. *Med. Oncol.* **31**, 915, <https://doi.org/10.1007/s12032-014-0915-6>
- 20 Yin, J., Wang, X., Wei, J. et al. (2015) Interleukin 12B rs3212227 T >G polymorphism was associated with an increased risk of gastric cardiac adenocarcinoma in a Chinese population. *Dis. Esophag.* **28**, 291–298
- 21 Tang, W., Chen, S., Chen, Y. et al. (2017) Programmed death-1 polymorphisms is associated with risk of esophagogastric junction adenocarcinoma in the Chinese Han population: a case-control study involving 2,740 subjects. *Oncotarget* **8**, 39198–39208
- 22 Zhang, S., Wang, Y., Jiang, H. et al. (2015) Peroxisome proliferator-activated receptor gamma rs1801282 C > G polymorphism is associated with polycystic ovary syndrome susceptibility: a meta-analysis involving 7,069 subjects. *Int. J. Clin. Exp. Med.* **8**, 17418–17429
- 23 Tang, W., Yu, P., Wang, Y. et al. (2015) Lack of association between cyclin D1 A870G (rs9344) polymorphism and esophageal squamous cell carcinoma risk: case-control study and meta-analysis. *Int. J. Clin. Exp. Med.* **8**, 12685–12695
- 24 Tang, W., Qiu, H., Jiang, H., Wang, L., Sun, B. and Gu, H. (2014) Aurora-A V57I (rs1047972) polymorphism and cancer susceptibility: a meta-analysis involving 27,269 subjects. *PLoS ONE* **9**, e90328, <https://doi.org/10.1371/journal.pone.0090328>
- 25 Tang, W., Wang, Y., Jiang, H. et al. (2015) Programmed death-1 (PD-1) rs2227981 C > T polymorphism is associated with cancer susceptibility: a meta-analysis. *Int. J. Clin. Exp. Med.* **8**, 22278–22285
- 26 Qiu, H., Wang, Y., Kang, M. et al. (2017) The relationship between IGF2BP2 and PPARG polymorphisms and susceptibility to esophageal squamous-cell carcinomas in the eastern Chinese Han population. *Oncotargets Ther.* **10**, 5525–5532, <https://doi.org/10.2147/OTT.S145776>
- 27 Qiu, H., Lin, X., Tang, W. et al. (2017) Investigation of TCF7L2, LEP and LEPR polymorphisms with esophageal squamous cell carcinomas. *Oncotarget* **8**, 109107–109119, <https://doi.org/10.18632/oncotarget.22619>
- 28 Tang, W., Qiu, H., Ding, H. et al. (2013) Association between the STK15 F31I polymorphism and cancer susceptibility: a meta-analysis involving 43,626 subjects. *PLoS ONE* **8**, e82790, <https://doi.org/10.1371/journal.pone.0082790>
- 29 Clifford, R.J., Zhang, J., Meerzaman, D.M. et al. (2010) Genetic variations at loci involved in the immune response are risk factors for hepatocellular carcinoma. *Hepatology* **52**, 2034–2043, <https://doi.org/10.1002/hep.23943>
- 30 Gu, X., Qi, P., Zhou, F. et al. (2010) +49G >A polymorphism in the cytotoxic T-lymphocyte antigen-4 gene increases susceptibility to hepatitis B-related hepatocellular carcinoma in a male Chinese population. *Hum. Immunol.* **71**, 83–87
- 31 Kim, Y.S., Cheong, J.Y., Cho, S.W. et al. (2009) A functional SNP of the Interleukin-18 gene is associated with the presence of hepatocellular carcinoma in hepatitis B virus-infected patients. *Dig. Dis. Sci.* **54**, 2722–2728, <https://doi.org/10.1007/s10620-009-0970-6>
- 32 Lin, Y., Su, C., Niu, J., Guo, Z. and Cai, L. (2015) Impact of mannose-binding lectin 2 polymorphism on the risk of hepatocellular carcinoma: a case-control study in Chinese Han population. *J. Epidemiol.* **25**, 387–391, <https://doi.org/10.2188/jea.JE20140194>
- 33 Saxena, R. and Kaur, J. (2015) Th1/Th2 cytokines and their genotypes as predictors of hepatitis B virus related hepatocellular carcinoma. *World J. Hepatol.* **7**, 1572–1580, <https://doi.org/10.4254/wjh.v7.i11.1572>
- 34 Gazave, E., Marques-Bonet, T., Fernando, O., Charlesworth, B. and Navarro, A. (2007) Patterns and rates of intron divergence between humans and chimpanzees. *Genome Biol.* **8**, R21, <https://doi.org/10.1186/gb-2007-8-2-r21>
- 35 Karabon, L., Jedynak, A., Tomkiewicz, A. et al. (2011) ICOS gene polymorphisms in B-cell chronic lymphocytic leukemia in the Polish population. *Folia Histochem. Cytobiol.* **49**, 49–54, <https://doi.org/10.5603/FHC.2011.0008>
- 36 Bouwhuis, M.G., Gast, A., Figl, A. et al. (2010) Polymorphisms in the CD28/CTLA4/ICOS genes: role in malignant melanoma susceptibility and prognosis. *Cancer Immunol. Immunother.* **59**, 303–312, <https://doi.org/10.1007/s00262-009-0751-2>
